# Supplementary material for: Mps1Mph1 Kinase Phosphorylates Mad3 to Inhibit Cdc20Slp1-APC/C and Maintain Spindle Checkpoint Arrests
Source: PubMed Central journal article supplement (PMC4755545; doi:10.1371/journal.pgen.1005834), 2016-02-16

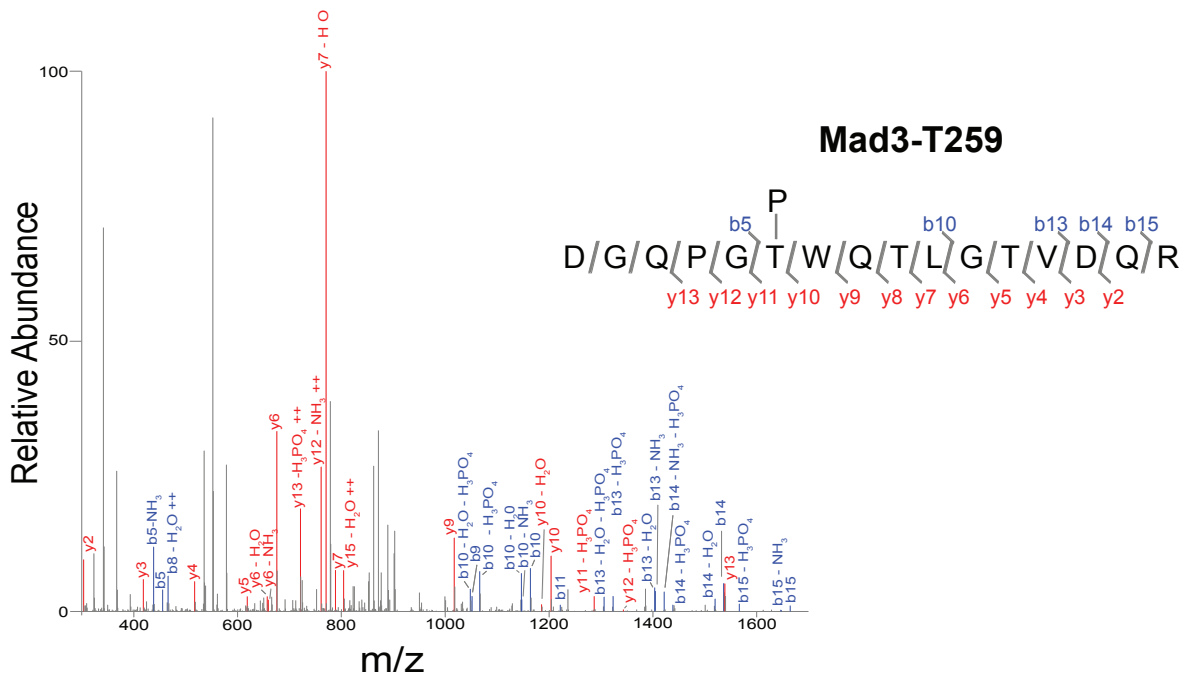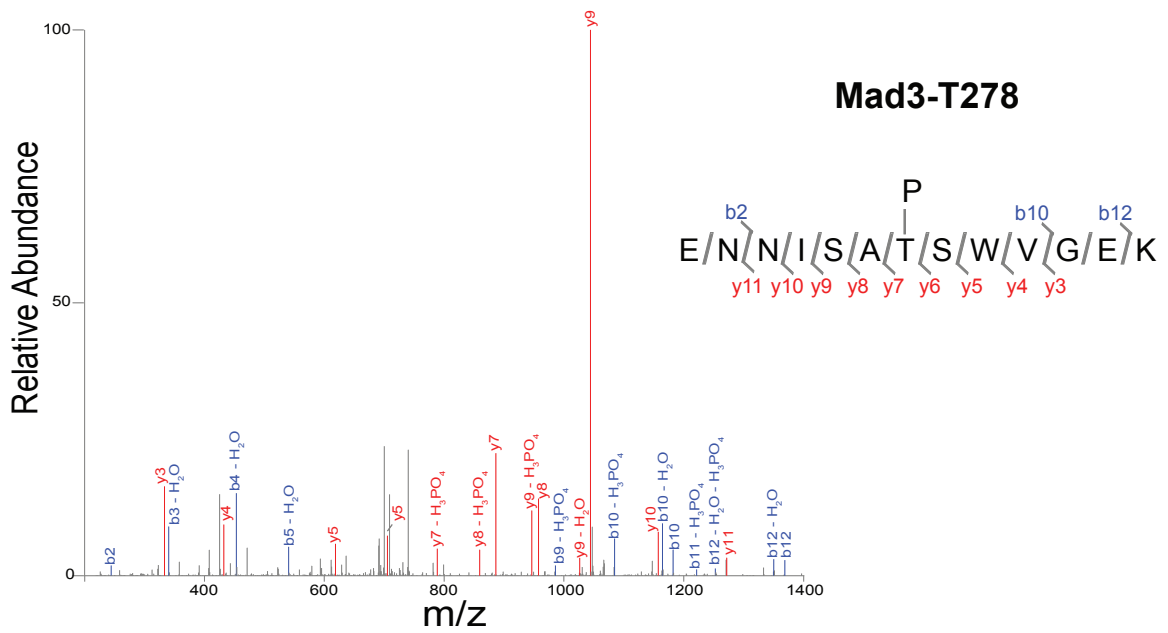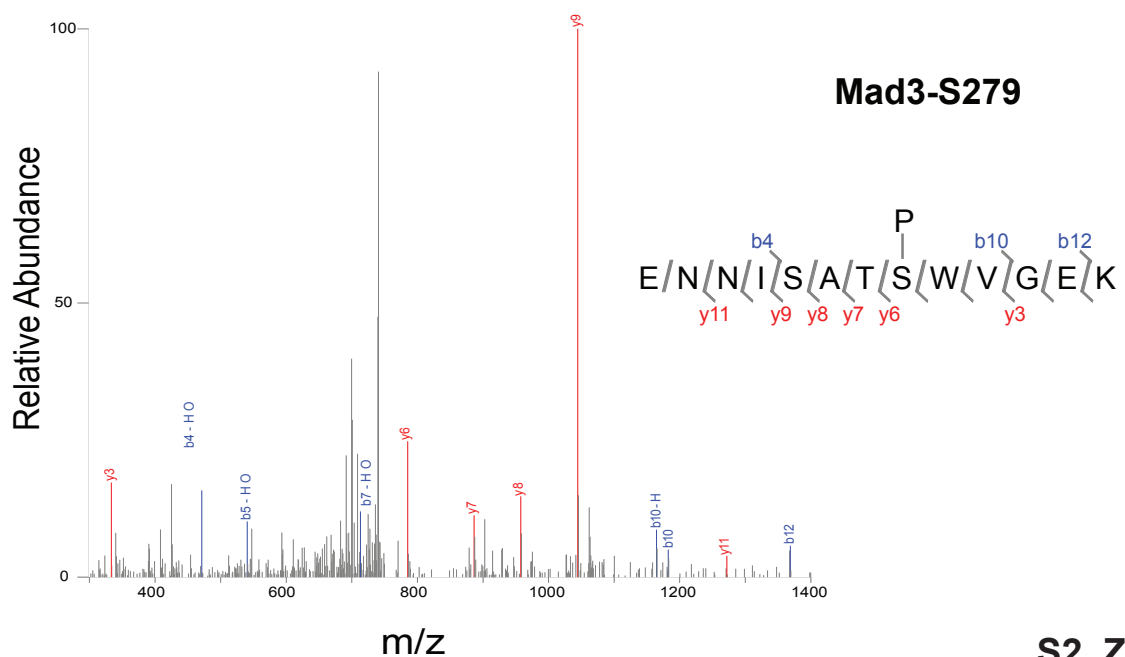

Supplement: pgen.1005834.s002.pdf [file pgen.1005834.s002.pdf]
