# Supplementary material for: Mps1Mph1 Kinase Phosphorylates Mad3 to Inhibit Cdc20Slp1-APC/C and Maintain Spindle Checkpoint Arrests
Source: PubMed Central journal article supplement (PMC4755545; doi:10.1371/journal.pgen.1005834), 2016-02-16

**A**

**60 mins after release**

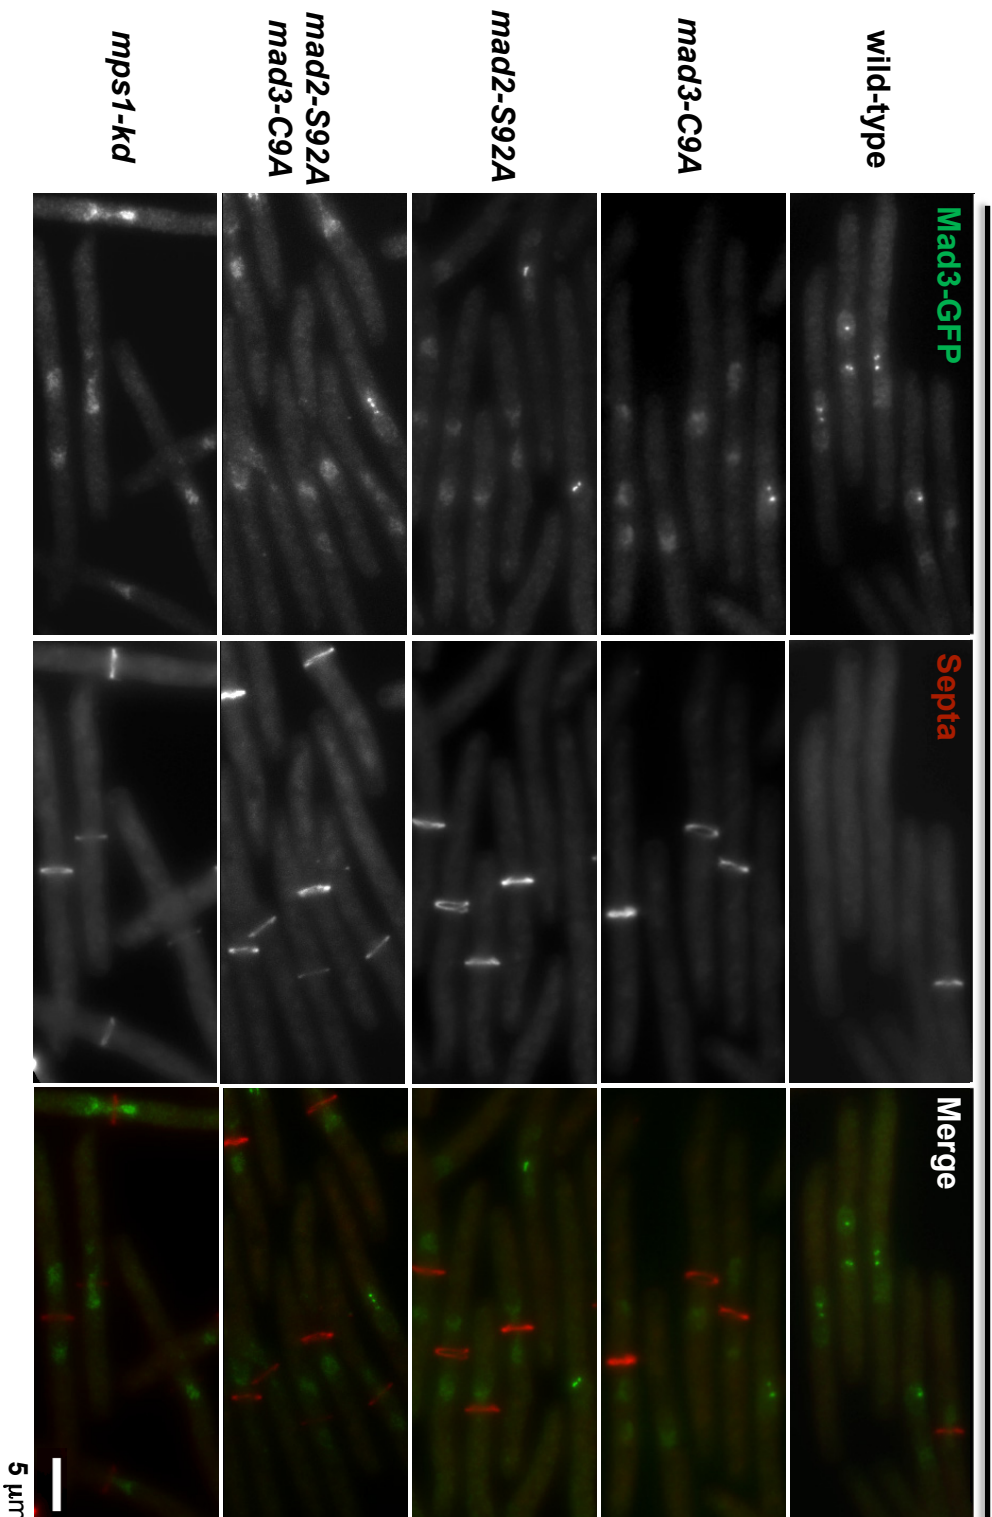

**B**

**mad3-C9A at 90 mins**

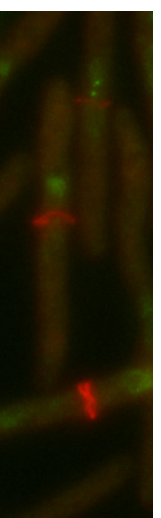

**mad3-C9A at 120 mins**

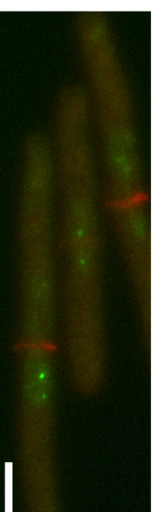

Supplement: pgen.1005834.s004.pdf [file pgen.1005834.s004.pdf]
