# Supplementary material for: Mps1Mph1 Kinase Phosphorylates Mad3 to Inhibit Cdc20Slp1-APC/C and Maintain Spindle Checkpoint Arrests
Source: PubMed Central journal article supplement (PMC4755545; doi:10.1371/journal.pgen.1005834), 2016-02-16
Supplement: pgen.1005834.s008.pdf [file pgen.1005834.s008.pdf]

## S1 Table

## Fission yeast strains

|                 |                 |                                                                                                                                     |                                                                                                      |          |
|-----------------|-----------------|-------------------------------------------------------------------------------------------------------------------------------------|------------------------------------------------------------------------------------------------------|----------|
| <b>Figure 1</b> | SP22            | <i>mad3-SZZ::kan<sup>r</sup> ade6-210 leu1-32 ura4-D18</i>                                                                          | This lab                                                                                             |          |
|                 | YJZ126          | <i>mph1ΔK-GFP mad3-SZZ::kan<sup>r</sup> ade6-210 leu1-32 ura4-D18</i>                                                               | This lab                                                                                             |          |
|                 | YJZ81           | <i>leu1<sup>+</sup>::mph1-kd-SZZ ade6-210 leu1-32 ura4-D18</i>                                                                      | This lab                                                                                             |          |
|                 | YJZ82           | <i>leu1<sup>+</sup>::mph1-SZZ ade6-210 leu1-32 ura4-D18</i>                                                                         | This lab                                                                                             |          |
| <b>Figure 2</b> | MS304           | <i>cdc25-22 lid1-TAP::Kan<sup>r</sup> mad3-GFP::his3<sup>+</sup> leu1-32 ura4-D18</i>                                               | This lab                                                                                             |          |
|                 | YJZ1086         | <i>cdc25-22 lid1-TAP::Kan<sup>r</sup> leu1<sup>+</sup>::mad3-C9A-GFP::NAT leu1-32 ura4-D18</i>                                      | This lab                                                                                             |          |
|                 | MS149           | <i>cdc25-22 lid1-TAP::Kan<sup>r</sup> mad3-KEN1-GFP::his3 leu1-32 ura4-D18</i>                                                      | This lab                                                                                             |          |
|                 | YJZ795          | <i>nuf2-3::ura4<sup>+</sup> leu1<sup>+</sup>::mad3 leu1-32 ura4-D18</i>                                                             | This lab                                                                                             |          |
|                 | YJZ801          | <i>nuf2-3::ura4<sup>+</sup> leu1<sup>+</sup>::mad3-N9A leu1-32 ura4-D18</i>                                                         | This lab                                                                                             |          |
|                 | YJZ798          | <i>nuf2-3::ura4<sup>+</sup> leu1<sup>+</sup>::mad3-C9A leu1-32 ura4-D18</i>                                                         | This lab                                                                                             |          |
|                 | YJZ792          | <i>nuf2-3::ura4<sup>+</sup> leu1<sup>+</sup>::mad3-18A leu1-32 ura4-D18</i>                                                         | This lab                                                                                             |          |
|                 | YJZ789          | <i>nuf2-3::ura4<sup>+</sup> leu1<sup>+</sup>::mad2-dimer leu1-32 ura4-D18</i>                                                       | This lab                                                                                             |          |
|                 | MS304           | <i>cdc25-22 lid1-TAP::Kan<sup>r</sup> mad3-GFP::his3<sup>+</sup> leu1-32 ura4-D18</i>                                               | This lab                                                                                             |          |
|                 | YJZ917          | <i>cdc25-22 lid1-TAP::Kan<sup>r</sup> mad3-GFP::his3<sup>+</sup> mph1-kd::leu1<sup>+</sup> leu1-32 ura4-D18</i>                     | This lab                                                                                             |          |
|                 | YJZ843          | <i>cdc25-22 lid1-TAP::Kan<sup>r</sup> mad3-GFP::his3<sup>+</sup> leu1<sup>+</sup>::mad2-S92A leu1-32 ura4-D18</i>                   | This lab                                                                                             |          |
|                 | YJZ1086         | <i>cdc25-22 lid1-TAP::Kan<sup>r</sup> leu1<sup>+</sup>::mad3-C9A-GFP::NAT leu1-32 ura4-D18</i>                                      | This lab                                                                                             |          |
|                 | YJZ1082         | <i>cdc25-22 lid1-TAP::Kan<sup>r</sup> leu1<sup>+</sup>::mad3-C9A-GFP::NAT leu1<sup>+</sup>::mad2-S92A leu1-32 ura4-D18</i>          | This lab                                                                                             |          |
|                 | YJZ914          | <i>nda3-KM311 GFP-plo1::ura4 leu1-32 ura4-D18</i>                                                                                   | This lab                                                                                             |          |
|                 | YJZ931          | <i>nda3-KM311 GFP-plo1::ura4 leu1<sup>+</sup>::mad2-S92A leu1-32 ura4-D18</i>                                                       | This lab                                                                                             |          |
|                 | YJZ943          | <i>nda3-KM311 GFP-plo1::ura4 leu1<sup>+</sup>::mad3-C9A leu1-32 ura4-D18</i>                                                        | This lab                                                                                             |          |
|                 | YJZ1099         | <i>nda3-KM311 GFP-plo1::ura4 leu1<sup>+</sup>::mad2-S92A leu1<sup>+</sup>::mad3-C9A leu1-32 ura4-D18</i>                            | This lab                                                                                             |          |
|                 | <b>Figure 3</b> | OS18                                                                                                                                | <i>cdc25-22 slp1-FLAG::hph mad3-GFP::his3<sup>+</sup> leu1-32 ura4-D18</i>                           | This lab |
|                 |                 | KM1218                                                                                                                              | <i>cdc25-22 slp1-FLAG::hph mad3-GFP::his3<sup>+</sup> mph1-kd::leu1<sup>+</sup> leu1-32 ura4-D18</i> | This lab |
| KM1253          |                 | <i>cdc25-22 slp1-FLAG::hph leu1<sup>+</sup>::mad3-C9A-GFP::NAT leu1-32 ura4-D18</i>                                                 | This lab                                                                                             |          |
| KM1254          |                 | <i>cdc25-22 slp1-FLAG::hph leu1<sup>+</sup>::mad2-S92A-GFP::NAT leu1-32 ura4-D18</i>                                                | This lab                                                                                             |          |
| KM1263          |                 | <i>cdc25-22 slp1-FLAG::hph leu1<sup>+</sup>::mad3-C9A-GFP::NAT leu1<sup>+</sup>::mad2-S92A leu1-32 ura4-D18</i>                     | This lab                                                                                             |          |
| <b>Figure 4</b> | MS304           | <i>cdc25-22 lid1-TAP::Kan<sup>r</sup> mad3-GFP::his3<sup>+</sup> leu1-32 ura4-D18</i>                                               | This lab                                                                                             |          |
|                 | MS149           | <i>cdc25-22 lid1-TAP::Kan<sup>r</sup> mad3-KEN1-GFP::his3 leu1-32 ura4-D18</i>                                                      | This lab                                                                                             |          |
|                 | MS150           | <i>cdc25-22 lid1-TAP::Kan<sup>r</sup> mad3-KEN2-GFP::his3 leu1-32 ura4-D18</i>                                                      | This lab                                                                                             |          |
| <b>Figure 5</b> | YJZ1126         | <i>cdc25-22 lid1-TAP::Kan<sup>r</sup> leu1<sup>+</sup>::mad3-GFP::NAT leu1-32 ura4-D18</i>                                          | This lab                                                                                             |          |
|                 | YJZ1086         | <i>cdc25-22 lid1-TAP::Kan<sup>r</sup> leu1<sup>+</sup>::mad3-C9A-GFP::NAT leu1-32 ura4-D18</i>                                      | This lab                                                                                             |          |
|                 | YJZ843          | <i>cdc25-22 lid1-TAP::Kan<sup>r</sup> leu1<sup>+</sup>::mad3-GFP::his3<sup>+</sup> leu1<sup>+</sup>::mad2-S92A leu1-32 ura4-D18</i> | This lab                                                                                             |          |
|                 | YJZ1082         | <i>cdc25-22 lid1-TAP::Kan<sup>r</sup> leu1<sup>+</sup>::mad3-C9A-GFP::NAT leu1<sup>+</sup>::mad2-S92A leu1-32 ura4-D18</i>          | This lab                                                                                             |          |
|                 | YJZ917          | <i>cdc25-22 lid1-TAP::Kan<sup>r</sup> mad3-GFP::his3<sup>+</sup> mph1-kd::leu1<sup>+</sup> leu1-32 ura4-D18</i>                     | This lab                                                                                             |          |
| <b>S3 Fig</b>   | KP114           | <i>ade6-210 leu1-32 ura4-D18</i>                                                                                                    | Allshire lab                                                                                         |          |
|                 | KP135           | <i>mad3Δ::ura4 leu1-32 ura4-D18</i>                                                                                                 | This lab                                                                                             |          |
|                 | YJZ721          | <i>leu1<sup>+</sup>::mad3-C9A leu1-32 ura4-D18</i>                                                                                  | This lab                                                                                             |          |
|                 | YJZ744          | <i>leu1<sup>+</sup>::mad3-N9A leu1-32 ura4-D18</i>                                                                                  | This lab                                                                                             |          |
|                 | YJZ738          | <i>leu1<sup>+</sup>::mad3-18A leu1-32 ura4-D18</i>                                                                                  | This lab                                                                                             |          |
|                 | YJZ1026         | <i>leu1<sup>+</sup>::mad3-C9A+5 leu1-32 ura4-D18</i>                                                                                | This lab                                                                                             |          |
|                 | MS316           | <i>mad3-S289A-GFP::his3<sup>+</sup> leu1-32 ura4-D18</i>                                                                            | This lab                                                                                             |          |
|                 | OS18            | <i>cdc25-22 slp1-FLAG::hph mad3-GFP::his3<sup>+</sup> leu1-32 ura4-D18</i>                                                          | This lab                                                                                             |          |
|                 | KM1218          | <i>cdc25-22 slp1-FLAG::hph mad3-GFP::his3<sup>+</sup> mph1-kd::leu1<sup>+</sup> leu1-32 ura4-D18</i>                                | This lab                                                                                             |          |

|               |                                                                                           |                                                                                                                            |              |
|---------------|-------------------------------------------------------------------------------------------|----------------------------------------------------------------------------------------------------------------------------|--------------|
|               | KM1347                                                                                    | <i>cdc25-22 slp1-FLAG::hph mad3-S289A -GFP::his3<sup>+</sup> leu1-32 ura4-D18</i>                                          | This lab     |
| <b>S4 Fig</b> | MS304                                                                                     | <i>cdc25-22 lid1-TAP::Kan<sup>r</sup> mad3-GFP::his3<sup>+</sup> leu1-32 ura4-D18</i>                                      | This lab     |
|               | YJZ917                                                                                    | <i>cdc25-22 lid1-TAP::Kan<sup>r</sup> mad3-GFP::his3<sup>+</sup> mph1-kd::leu1<sup>+</sup> leu1-32 ura4-D18</i>            | This lab     |
|               | YJZ843                                                                                    | <i>cdc25-22 lid1-TAP::Kan<sup>r</sup> mad3-GFP::his3<sup>+</sup> leu1<sup>+</sup>::mad2-S92A leu1-32 ura4-D18</i>          | This lab     |
|               | YJZ1086                                                                                   | <i>cdc25-22 lid1-TAP::Kan<sup>r</sup> leu1<sup>+</sup>::mad3-C9A-GFP::NAT leu1-32 ura4-D18</i>                             | This lab     |
|               | YJZ1082                                                                                   | <i>cdc25-22 lid1-TAP::Kan<sup>r</sup> leu1<sup>+</sup>::mad3-C9A-GFP::NAT leu1<sup>+</sup>::mad2-S92A leu1-32 ura4-D18</i> | This lab     |
|               |                                                                                           |                                                                                                                            |              |
| <b>S5 Fig</b> | MS149                                                                                     | <i>cdc25-22 lid1-TAP::Kan<sup>r</sup> mad3-KEN1-GFP::his3 leu1-32 ura4-D18</i>                                             | This lab     |
|               | MS150                                                                                     | <i>cdc25-22 lid1-TAP::Kan<sup>r</sup> mad3-KEN2-GFP::his3 leu1-32 ura4-D18</i>                                             | This lab     |
|               | OS18                                                                                      | <i>cdc25-22 slp1-FLAG::hph mad3-GFP::his3<sup>+</sup> leu1-32 ura4-D18</i>                                                 | This lab     |
|               | KM1218                                                                                    | <i>cdc25-22 slp1-FLAG::hph mad3-GFP::his3<sup>+</sup> mph1-kd::leu1<sup>+</sup> leu1-32 ura4-D18</i>                       | This lab     |
|               | KM1253                                                                                    | <i>cdc25-22 slp1-FLAG::hph leu1<sup>+</sup>::mad3-C9A-GFP::NAT leu1-32 ura4-D18</i>                                        | This lab     |
|               | KM1254                                                                                    | <i>cdc25-22 slp1-FLAG::hph mad3<sup>+</sup> leu1<sup>+</sup>::mad2-S92A-GFP::NAT leu1-32 ura4-D18</i>                      | This lab     |
|               | KM1263                                                                                    | <i>cdc25-22 slp1-FLAG::hph leu1<sup>+</sup>::mad3-C9A-GFP::NAT leu1<sup>+</sup>::mad2-S92A leu1-32 ura4-D18</i>            | This lab     |
| <b>S6 Fig</b> | OS18                                                                                      | <i>cdc25-22 slp1-FLAG::hph mad3-GFP::his3<sup>+</sup> leu1-32 ura4-D18</i>                                                 | This lab     |
|               | KM1218                                                                                    | <i>cdc25-22 slp1-FLAG::hph mad3-GFP::his3<sup>+</sup> mph1-kd::leu1<sup>+</sup> leu1-32 ura4-D18</i>                       | This lab     |
|               | KM1253                                                                                    | <i>cdc25-22 slp1-FLAG::hph leu1<sup>+</sup>::mad3-C9A-GFP::NAT leu1-32 ura4-D18</i>                                        | This lab     |
|               | KM1254                                                                                    | <i>cdc25-22 slp1-FLAG::hph leu1<sup>+</sup>::mad2-S92A-GFP::NAT leu1-32 ura4-D18</i>                                       | This lab     |
|               | KM1263                                                                                    | <i>cdc25-22 slp1-FLAG::hph leu1<sup>+</sup>::mad3-C9A-GFP::NAT leu1<sup>+</sup>::mad2-S92A leu1-32 ura4-D18</i>            | This lab     |
|               |                                                                                           |                                                                                                                            |              |
| <b>S7 Fig</b> | MS304                                                                                     | <i>cdc25-22 lid1-TAP::Kan<sup>r</sup> mad3-GFP::his3<sup>+</sup> leu1-32 ura4-D18</i>                                      | This lab     |
|               | MS149                                                                                     | <i>cdc25-22 lid1-TAP::Kan<sup>r</sup> mad3-KEN1-GFP::his3 leu1-32 ura4-D18</i>                                             | This lab     |
|               | YJZ1196                                                                                   | <i>cdc25-22 lid1-TAP::Kan<sup>r</sup> leu1<sup>+</sup>::mad3-3D/E-GFP::NAT leu1-32 ura4-D18</i>                            | This lab     |
|               | YJZ1194                                                                                   | <i>cdc25-22 lid1-TAP::Kan<sup>r</sup> leu1<sup>+</sup>::mad3-4D/E-GFP::NAT leu1-32 ura4-D18</i>                            | This lab     |
|               | YJZ1198                                                                                   | <i>cdc25-22 lid1-TAP::Kan<sup>r</sup> leu1<sup>+</sup>::mad3-7D/E-GFP::NAT leu1-32 ura4-D18</i>                            | This lab     |
|               | KP114                                                                                     | <i>ade6-210 leu1-32 ura4-D18</i>                                                                                           | Allshire lab |
|               | KP135                                                                                     | <i>mad3Δ::ura4 ade6-210 leu1-32 ura4-D18</i>                                                                               | This lab     |
|               | KP404                                                                                     | <i>mad3-KEN1-GFP::his3 ade6-210 leu1-32 ura4-D18</i>                                                                       | This lab     |
|               | YJZ1143                                                                                   | <i>leu1<sup>+</sup>::mad3-3D/E ade6-210 leu1-32 ura4-D18</i>                                                               | This lab     |
|               | YJZ1141                                                                                   | <i>leu1<sup>+</sup>::mad3-4D/E ade6-210 leu1-32 ura4-D18</i>                                                               | This lab     |
|               | YJZ1135                                                                                   | <i>leu1<sup>+</sup>::mad3-6D/E ade6-210 leu1-32 ura4-D18</i>                                                               | This lab     |
|               | YJZ1148                                                                                   | <i>leu1<sup>+</sup>::mad3-7D/E ade6-210 leu1-32 ura4-D18</i>                                                               | This lab     |
|               | YJZ1171                                                                                   | <i>nda3-KM311 plo1-GFP::ura4<sup>+</sup> leu1<sup>+</sup>::mad3-3D/E leu1-32 ura4-D18</i>                                  | This lab     |
|               | YJZ1177                                                                                   | <i>nda3-KM311 plo1-GFP::ura4<sup>+</sup> leu1<sup>+</sup>::mad3-4D/E leu1-32 ura4-D18</i>                                  | This lab     |
|               | YJZ1174                                                                                   | <i>nda3-KM311 plo1-GFP::ura4<sup>+</sup> leu1<sup>+</sup>::mad3-6D/E leu1-32 ura4-D18</i>                                  | This lab     |
| YJZ1180       | <i>nda3-KM311 plo1-GFP::ura4<sup>+</sup> leu1<sup>+</sup>::mad3-7D/E leu1-32 ura4-D18</i> | This lab                                                                                                                   |              |
| YJZ227        | <i>nda3-KM311 plo1-GFP::ura4<sup>+</sup> mad2Δ::ura4<sup>+</sup> leu1-32 ura4-D18</i>     | This lab                                                                                                                   |              |
