# Supplementary material for: Mps1Mph1 Kinase Phosphorylates Mad3 to Inhibit Cdc20Slp1-APC/C and Maintain Spindle Checkpoint Arrests
Source: PLoS Genet. 2016 Feb 16;12(2):e1005834. doi: 10.1371/journal.pgen.1005834 (PMC4755545; doi:10.1371/journal.pgen.1005834)
Supplement: S1 Fig — (A) Fission yeast Mad3p alignments. These fission yeast sequences are available at the Broad Institute (MIT, Harvard). The two sets of mutations (generating N9A and C9A) are highlighted on the S. pombe sequence with red boxes. T82 (a putative Aurora site) is in green. (B) Phosphosites identified. The superscript indicates the number with number of unique spectra/peptides in which the phosphorylated residue was identified. The residues highlighted in red (identified in vitro and confirmed in vivo) were only observed in mitotic samples. (PDF) [file pgen.1005834.s001.pdf]

SpomMad3 1 MEPLDAGKKNWVHMDVIEQ**S**KENIEPRKAGH**S****S**ALAK**S****S**SRNH**T**EKEVAGLQKERMGHER 60  
SoctMad3 1 - MNTTAKQTQTSDIDIEQAKENIEPRRQGHSA~~AA~~ISKTF**S**KDHEQKVS**N**QLLHEERISFEE 59  
SjapMad3 1 - - - MSGSKIVNIETIE**F**QKENIEPRREGHRRARALEKA**F**TRDPSESAIKDIEATKQSYEE 56  
ScryMad3 1 - MDSTSKQNQASIDIDIEHSKENIEPRRQGHSA**S**AI**S**KAF**S**KDHEQKYS**N**QLLHEERAN**F**E**K** 59

SpomMad3 61 KIE**T**ES~~E~~SLD**D**PLQVWIDYIK**W**TLDNFPQGET**K****T****S**GLVTL**L**LERCTREFVRNPPLYKDDVRYL 120  
SoctMad3 60 KLQIADREEDPLQVWIDYIQWTLNSYPQGNTSES**G**LL**S**LLERCSQQFVKSPPIYKNDIRYL 119  
SjapMad3 57 AIQNTGTTDDPL**E**PLWLYIQWTL**E**TFPQGD**S**NVSEFVRL**L**LERCTQHFLKDPPLYQNDIRYL 116  
ScryMad3 60 KLVSGDEEDPLQI**W**IDYIQWTLNSYPQGNT**T**ESGL**S**LLERCSQHFIKVPPVYKNDIRYL 119

SpomMad3 121 RIWMQYVNYIDEPV**E**LF**S**FLAH**H**IGQESSIF**Y**EEY**A**NYFESRGL**F**QKADEVYQKGKRMK 180  
SoctMad3 120 RIWMQYAKYV**E**DDPAEL**F**SFLSLHEIGTN**F**SLYEE**F**AGYFESNGLYKKAEDVYQKGFLRK 176  
SjapMad3 117 K**V**WLRYPAYTNDPAEL**F**SFL**E**VHKIGLQ**F**SIYEE**A**NYFESKGLYAKALS**I**YNRGQERH 179  
ScryMad3 120 RIWMQYAKYVDDPAEL**F**SFLSLHEIGTN**F**SLYEE**F**AS**Y**YESKGSYKKAEE**I**YQKGFLRK 179

SpomMad3 181 AKPFLRFQK**Y**Q**Q**FT**H**RWLEFAPQ**S**FS**S**-NTNSVNP**L**QTT**F**EST**N**IQEIS- - - - - 229  
SoctMad3 180 AKPFARFQ**R**YDQFL**H**RKV**I**YAPDTITMRQTNEYP**L**QTT**F**QLSNPHQQN- - - - - 229  
SjapMad3 177 ARPALRFEE**R**REFLY**R**CM**E**KAPDCLKEQT-**L**PETAL**Q**IK**F**ENTLSLGSDSSSS**S**TLSSH 235  
ScryMad3 180 AKPFARFQ**E**RYHQ**F**V**H**RRV**I**YAPDTISTSP**T**NEYP**L**QTT**Y**QASSLQPK**S**- - - - - 229

SpomMad3 230 QSR**T**KISKPKFK**F**SV**Y****S**DADG- - - **S**SGKG**D**G**P**G**T**W**Q****T****L**G**T**V**D**QRRKENNIS**S**AT**S**WVGEKL 285  
SoctMad3 230 GRSEVS**V**SDARRIS**V**FS**D**T**E**GT**S**STNGRSTNPTSWEN**F**GT**V**EQKRKENTVPSRAWVGETL 289  
SjapMad3 236 AA**A**HFRKP**V**QKRIT**V**FS**D**ASGD- - - **P**SSTLD**T**AW**E**Q**F**GSRAVR**R**KENTISATPWVG**V**TL 291  
ScryMad3 230 R**S**NED**S**IP**E**ARK**F**SV**F**SD**A**E**A**IESQNGK**F**SN**P**SS**W**E**A**FGT**V**EQKRKENTIPSRRAWVGEIL 289

SpomMad3 286 **P**L**K****S**PRK**L**DLPLG**K**FQ**V**HCDEEV**S**KE\*- - - - - 311  
SoctMad3 290 Q**T**H**S**SRK**V**DP**L**NT**F**SV**Y**Q**D**ESS**S**H\*- - - - - 314  
SjapMad3 292 **P**IK**S**R**K**-STT**S**HK**L**H**V**YRDEQ**I**PLQQTLPPTMEEDAKSGVN**F**A**F**H**V**HDCYPQ**G**PHG**I**EL**S** 350  
ScryMad3 290 HT**Q****S**SRK**V**DP**L**DN**F**SV**Y**Q**D**ET**S**SH\*- - - - - 314

SpomMad3 - - - - -  
SoctMad3 - - - - -  
SjapMad3 351 PEEVR**A**K**K**Y**I**T**F**\* - - - - - 363  
ScryMad3 - - - - -

### Mad3 phospho-sites

### *in vitro* Mps1 kinase assay

S19, S31, S33, S38, S40, T44, T64,  
T93, S94, T195, T259, T262, T265  
S276, T278, S279

*in vivo* Mad3-TAP

S19, S31, S33<sup>2</sup>, T64<sup>2</sup>,  
T82<sup>3(Ark1?)</sup>, S246<sup>2</sup>, S251<sup>3</sup>, T259<sup>2</sup>  
S276<sup>3</sup>, T278, S279, S289<sup>10(CDK)</sup>

*in vitro* Mps1 sites  
confirmed *in vivo*

**S19,S31,S33,T64,  
T259,S276,T278,S279**
